# Supplementary material for: Connectivity patterns in the DMN that are impacted by traumatic stress
Source: Research Square preprint supplement (doi:10.21203/rs.3.rs-9544648/v1), 2026-07-03
Supplement: Supplementary file 1 [file 945e14138ceae257ff22922e.docx]

Table 1

| Modules | prestress | Post-control | Post-SPS |
| --- | --- | --- | --- |
| Anterior | mOFC, vOFC, lOFC, PL, ACC, rRSC | mOFC, vOFC, lOFC, PL, | mOFC, vOFC, lOFC, PL, ACC |
| Posterior | PC, TC, cRSC, Au, VC2, dCA3, dCA1, CA2, ACC | PC, TC, cRSC, Au, VC2, dCA1, CA2, | PC, TC, cRSC, Au, VC2, dCA3, dCA1, CA2, ACC |
| None |  | ACC, rRSC, dCA3 | rRSC |
| **Note**. Node that comprised the different DMN modules in this study. mOFC: medial orbitofrontal cortex, vOFC: ventral orbitofrontal cortex, lOFC: lateral orbitofrontal cortex, PL: prelimbic cortex, ACC: anterior cingulate cortex, rRSC: rostral retrosplenial cortex, cRSC: caudal retrosplenial cortex, PC: parietal cortex, TC: temporal cortex, Au: Auditory cortex, dCA1: dorsal CA1, dCA3: dorsal CA3, VC2: secondary visual cortex | | | |
