# Supplementary material for: Connectivity patterns in the DMN that are impacted by traumatic stress
Source: Research Square preprint supplement (doi:10.21203/rs.3.rs-9544648/v1), 2026-07-03
Supplement: Supplementary file 2 [file b31f2684a0ecc74384b97167.docx]

**Supplemental Data**

**Summary**: In this supplemental dataset we give the numbers used for the correlational analyses involving c-Fos (Tables 1-7). These numbers are drawn from a data set we generated. Data from this dataset was first published in 2017 (1) and contains c-Fos for multiple brain regions from SPS and control rats that were either subjected to fear/threat conditioning or presented with tone-CSs in the absence of footshock. All rats were then subjected to extinction training and testing.

**Table 1: Baseline**

|  | ACC vs. OFC | ACC vs. RSC | ACC vs. dCA1 | OFC vs. RSC | OFC vs. dCA1 | RSC vs. dCA1 |
| --- | --- | --- | --- | --- | --- | --- |
| SPS | 14 | 12 | 14 | 12 | 9 | 11 |
| Control | 14 | 6 | 13 | 6 | 9 | 14 |
| **Note:** Numbers used for baseline correlations | | | | | | |

**Table 2: Fear/threat conditioning (CS-Fear)**

|  | ACC vs. OFC | ACC vs. RSC | ACC vs. dCA1 | OFC vs. RSC | OFC vs. dCA1 | RSC vs. dCA1 |
| --- | --- | --- | --- | --- | --- | --- |
| SPS | 7 | 4 | 8 | 4 | 9 | 4 |
| Control | 9 | 8 | 9 | 8 | 9 | 8 |
| **Note:** Numbers used to generate correlations for animals that were subjected to fear/threat conditioning | | | | | | |

**Table 3: Novel tone presentation (CS-Only)**

|  | ACC vs. OFC | ACC vs. RSC | ACC vs. dCA1 | OFC vs. RSC | OFC vs. dCA1 | RSC vs. dCA1 |
| --- | --- | --- | --- | --- | --- | --- |
| SPS | 7 | 4 | 8 | 4 | 7 | 4 |
| Control | 9 | 8 | 9 | 8 | 9 | 8 |
| **Note:** Numbers used to generate correlations for animals that were subjected to only tone presentation during fear conditioning (i.e. novel tones). We refer to these animals as fear/threat conditioning/CS-Only. | | | | | | |

**Table 4: Extinction training (CS-Fear)**

|  | ACC vs. OFC | ACC vs. RSC | ACC vs. dCA1 | OFC vs. RSC | OFC vs. dCA1 | RSC vs. dCA1 |
| --- | --- | --- | --- | --- | --- | --- |
| SPS | 8 | 8 | 8 | 8 | 8 | 8 |
| Control | 8 | 8 | 8 | 8 | 8 | 7 |
| **Note:** Numbers used to generate correlations for animals that were subjected to fear/threat conditioning, then an extinction training session. We refer to these animals as extinction training/CS-Fear. | | | | | | |

**Table 5: 2nd tone presentation (CS-Only)**

|  | ACC vs. OFC | ACC vs. RSC | ACC vs. dCA1 | OFC vs. RSC | OFC vs. dCA1 | RSC vs. dCA1 |
| --- | --- | --- | --- | --- | --- | --- |
| SPS | 9 | 9 | 9 | 9 | 9 | 9 |
| Control | 9 | 9 | 9 | 8 | 8 | 8 |
| **Note:** Numbers used to generate correlations for animals that were subjected initially presented with a tone, then presented with a tone again one day later. We refer to these animals as extinction training/CS-Only. | | | | | | |

**Table 6: Extinction testing (CS-Fear)**

|  | ACC vs. OFC | ACC vs. RSC | ACC vs. dCA1 | OFC vs. RSC | OFC vs. dCA1 | RSC vs. dCA1 |
| --- | --- | --- | --- | --- | --- | --- |
| SPS | 9 | 9 | 9 | 9 | 9 | 9 |
| Control | 8 | 6 | 8 | 6 | 8 | 7 |
| **Note:** Numbers used to generate correlations for animals that were subjected to fear/threat conditioning, then an extinction training session. We refer to these animals as extinction testimg/CS-Fear. | | | | | | |

**Table 7: 3rd tone presentation (CS-Only)**

|  | ACC vs. OFC | ACC vs. RSC | ACC vs. dCA1 | OFC vs. RSC | OFC vs. dCA1 | RSC vs. dCA1 |
| --- | --- | --- | --- | --- | --- | --- |
| SPS | 9 | 9 | 9 | 9 | 9 | 9 |
| Control | 8 | 8 | 8 | 8 | 8 | 8 |
| **Note:** Numbers used to generate correlations for animals that were subjected to tone presentation twice (during fear conditioning and extinction training). We refer to these animals as extinction testing/CS-Only. | | | | | | |

**REFERENCES**

1. Knox D, Stanfield BR, Staib JM, David NP, Keller SM, DePietro T (2016): Neural circuits via which single prolonged stress exposure leads to fear extinction retention deficits. *Learn Mem*. 23:689-698.
